# Supplementary material for: Small Molecular Drug Screening Based on Clinical Therapeutic Effect
Source: MDPI journal article supplement (doi:10.3390/molecules27154807), 2022-07-27
Supplement: s1 [file s1]

# Small Molecular Drug Screening Based on Clinical Therapeutic Effect

Cai Zhong, Jiali Ai, Yaxin Yang, Fangyuan Ma, Wei Sun \*

Supplementary Table S1.

Table S1. Molecules information included in four molecular sets.

| No. | Name                                 | Category  | No. | Name                                    | Category      |
|-----|--------------------------------------|-----------|-----|-----------------------------------------|---------------|
| 1   | Aceclofenac <sup>1234</sup>          | Analgesic | 511 | Ceftaroline fosamil <sup>1234</sup>     | Antibacterial |
| 2   | Acemetacin <sup>1234</sup>           | Analgesic | 512 | Ceftazidime <sup>1234</sup>             | Antibacterial |
| 3   | Acetaminophen <sup>1234</sup>        | Analgesic | 513 | Cefteram <sup>1234</sup>                | Antibacterial |
| 4   | Acetanilide <sup>1234</sup>          | Analgesic | 514 | Ceftezole <sup>1234</sup>               | Antibacterial |
| 5   | Acetyldihydrocodeine <sup>1234</sup> | Analgesic | 515 | Ceftibuten <sup>1234</sup>              | Antibacterial |
| 6   | Alclofenac <sup>1234</sup>           | Analgesic | 516 | Ceftiofur <sup>123</sup>                | Antibacterial |
| 7   | Alfentanil <sup>1234</sup>           | Analgesic | 517 | Ceftiolene <sup>1234</sup>              | Antibacterial |
| 8   | Allobarbitol <sup>12</sup>           | Analgesic | 518 | Ceftizoxime <sup>1234</sup>             | Antibacterial |
| 9   | Alminoprofen <sup>1234</sup>         | Analgesic | 519 | Ceftobiprole <sup>1234</sup>            | Antibacterial |
| 10  | Almotriptan <sup>1234</sup>          | Analgesic | 520 | Unii-yxv28V1B07 <sup>1234</sup>         | Antibacterial |
| 11  | Alphaprodine <sup>1234</sup>         | Analgesic | 521 | Ceftolozane <sup>1234</sup>             | Antibacterial |
| 12  | Aminophenazone <sup>1234</sup>       | Analgesic | 522 | Ceftriaxone <sup>1234</sup>             | Antibacterial |
| 13  | Amitriptyline <sup>1234</sup>        | Analgesic | 523 | Cefuroxime <sup>1234</sup>              | Antibacterial |
| 14  | Ampiroxicam <sup>1234</sup>          | Analgesic | 524 | Ceftin <sup>1234</sup>                  | Antibacterial |
| 15  | Ampyrone <sup>1234</sup>             | Analgesic | 525 | Cefuzonam <sup>1234</sup>               | Antibacterial |
| 16  | Anileridine <sup>1234</sup>          | Analgesic | 526 | Cephalosporin C <sup>1234</sup>         | Antibacterial |
| 17  | Antipyrine <sup>1234</sup>           | Analgesic | 527 | Cethromycin <sup>1234</sup>             | Antibacterial |
| 18  | Articaine <sup>12</sup>              | Analgesic | 528 | Chloramphenicol <sup>1234</sup>         | Antibacterial |
| 19  | Aspirin <sup>1234</sup>              | Analgesic | 529 | Chlortetracycline <sup>1234</sup>       | Antibacterial |
| 20  | Azapropazone <sup>1234</sup>         | Analgesic | 530 | Cinoxacin <sup>1234</sup>               | Antibacterial |
| 21  | Bendazac <sup>1234</sup>             | Analgesic | 531 | Ciprofloxacin <sup>1234</sup>           | Antibacterial |
| 22  | Benorilate <sup>1234</sup>           | Analgesic | 532 | Clarithromycin <sup>1234</sup>          | Antibacterial |
| 23  | Benoxaprofen <sup>1234</sup>         | Analgesic | 533 | Clavulanic acid <sup>1234</sup>         | Antibacterial |
| 24  | Benzocaine <sup>1</sup>              | Analgesic | 534 | Clinafloxacin <sup>1234</sup>           | Antibacterial |
| 25  | Benzydamine <sup>1234</sup>          | Analgesic | 535 | Clindamycin <sup>1234</sup>             | Antibacterial |
| 26  | Benzylmorphine <sup>1234</sup>       | Analgesic | 536 | Clofoctol <sup>1234</sup>               | Antibacterial |
| 27  | Bezitramide <sup>1234</sup>          | Analgesic | 537 | Clometocillin <sup>1234</sup>           | Antibacterial |
| 28  | Bromfenac <sup>1234</sup>            | Analgesic | 538 | Clomocycline <sup>1234</sup>            | Antibacterial |
| 29  | Bucetin <sup>1234</sup>              | Analgesic | 539 | Cloxacillin <sup>1234</sup>             | Antibacterial |
| 30  | Bufexamac <sup>1234</sup>            | Analgesic | 540 | Colistin <sup>1234</sup>                | Antibacterial |
| 31  | Bumadizone <sup>1234</sup>           | Analgesic | 541 | Cycloserine <sup>1234</sup>             | Antibacterial |
| 32  | Buprenorphine <sup>1234</sup>        | Analgesic | 542 | Dalfopristin <sup>123</sup>             | Antibacterial |
| 33  | Butanilcaine <sup>1</sup>            | Analgesic | 543 | Danofloxacin <sup>123</sup>             | Antibacterial |
| 34  | Butorphanol <sup>1234</sup>          | Analgesic | 544 | Dapsone <sup>12</sup>                   | Antibacterial |
| 35  | Camphor <sup>1234</sup>              | Analgesic | 545 | Daptomycin <sup>1234</sup>              | Antibacterial |
| 36  | Cannabidiol <sup>1234</sup>          | Analgesic | 546 | Deacetoxycephalosporin C <sup>123</sup> | Antibacterial |
| 37  | Capsaicin <sup>123</sup>             | Analgesic | 547 | Delafloxacin <sup>1234</sup>            | Antibacterial |
| 38  | Carbamazepine                        | Analgesic | 548 | Demeclocycline <sup>1234</sup>          | Antibacterial |
| 39  | Carfentanil <sup>123</sup>           | Analgesic | 549 | Dibekacin <sup>1234</sup>               | Antibacterial |
| 40  | Carisoprodol <sup>1</sup>            | Analgesic | 550 | Dicloxacin <sup>1234</sup>              | Antibacterial |
| 41  | Chloroprocaine <sup>12</sup>         | Analgesic | 551 | Difloxacin <sup>123</sup>               | Antibacterial |
| 42  | Chlorzoxazone <sup>1</sup>           | Analgesic | 552 | Dihydrostreptomycin <sup>1234</sup>     | Antibacterial |

|    |                                      |           |     |                                |               |
|----|--------------------------------------|-----------|-----|--------------------------------|---------------|
| 43 | Cinchocaine <sup>12</sup>            | Analgesic | 553 | Dirithromycin <sup>1234</sup>  | Antibacterial |
| 44 | Clonidine <sup>1234</sup>            | Analgesic | 554 | Doripenem <sup>1234</sup>      | Antibacterial |
| 45 | Cocaine <sup>1</sup>                 | Analgesic | 555 | Doxycycline <sup>1234</sup>    | Antibacterial |
| 46 | Codeine <sup>1234</sup>              | Analgesic | 556 | Enoxacin <sup>1234</sup>       | Antibacterial |
| 47 | Cyclobenzaprine <sup>1</sup>         | Analgesic | 557 | Enrofloxacin <sup>12</sup>     | Antibacterial |
| 48 | Cyclomethycaine <sup>1</sup>         | Analgesic | 558 | Eperezolid <sup>123</sup>      | Antibacterial |
| 49 | Desomorphine <sup>1234</sup>         | Analgesic | 559 | Epicillin <sup>1234</sup>      | Antibacterial |
| 50 | Dexmedetomidine <sup>12</sup>        | Analgesic | 560 | Eravacycline <sup>1234</sup>   | Antibacterial |
| 51 | Dextromoramide <sup>1234</sup>       | Analgesic | 561 | Ertapenem <sup>1234</sup>      | Antibacterial |
| 52 | Dextropropoxyphene <sup>1234</sup>   | Analgesic | 562 | Erythromycin <sup>1234</sup>   | Antibacterial |
| 53 | Dezocine <sup>1234</sup>             | Analgesic | 563 | Faropenem <sup>1234</sup>      | Antibacterial |
| 54 | Diacerein <sup>1234</sup>            | Analgesic | 564 | Finafloxacin <sup>1234</sup>   | Antibacterial |
| 55 | Diamorphine <sup>1234</sup>          | Analgesic | 565 | Fleroxacin <sup>1234</sup>     | Antibacterial |
| 56 | Diclofenac <sup>1234</sup>           | Analgesic | 566 | Flomoxef <sup>1234</sup>       | Antibacterial |
| 57 | Diflunisal <sup>1234</sup>           | Analgesic | 567 | Florfenicol <sup>123</sup>     | Antibacterial |
| 58 | Dihydrocodeine <sup>1234</sup>       | Analgesic | 568 | Flucloxacillin <sup>1234</sup> | Antibacterial |
| 59 | Dihydroergotamine <sup>1234</sup>    | Analgesic | 569 | Flumequine <sup>1234</sup>     | Antibacterial |
| 60 | Dihydromorphine <sup>1234</sup>      | Analgesic | 570 | Flurithromycin <sup>1234</sup> | Antibacterial |
| 61 | Dimenoxadol <sup>1234</sup>          | Analgesic | 571 | Fosfomycin <sup>1234</sup>     | Antibacterial |
| 62 | Dimethocaine <sup>1</sup>            | Analgesic | 572 | Framycetin <sup>1234</sup>     | Antibacterial |
| 63 | Dimetotiazine <sup>1234</sup>        | Analgesic | 573 | Furazidin <sup>1234</sup>      | Antibacterial |
| 64 | Dipipanone <sup>1234</sup>           | Analgesic | 574 | Furazolidone <sup>123</sup>    | Antibacterial |
| 65 | Dipyrocetyl <sup>1234</sup>          | Analgesic | 575 | Fusidic acid <sup>1234</sup>   | Antibacterial |
| 66 | Dronabinol <sup>1234</sup>           | Analgesic | 576 | Garenoxacin <sup>12</sup>      | Antibacterial |
| 67 | Droxicam <sup>1234</sup>             | Analgesic | 577 | Gatifloxacin <sup>1234</sup>   | Antibacterial |
| 68 | DSP-2230 <sup>12</sup>               | Analgesic | 578 | Gemifloxacin <sup>1234</sup>   | Antibacterial |
| 69 | Dyclonine <sup>1</sup>               | Analgesic | 579 | Gentamicin <sup>1234</sup>     | Antibacterial |
| 70 | Eletriptan <sup>1234</sup>           | Analgesic | 580 | Grepafloxacin <sup>1234</sup>  | Antibacterial |
| 71 | Ergotamine <sup>1234</sup>           | Analgesic | 581 | Hetacillin <sup>1234</sup>     | Antibacterial |
| 72 | Ethenzamide <sup>1234</sup>          | Analgesic | 582 | Hygromycin B <sup>123</sup>    | Antibacterial |
| 73 | Ethoheptazine <sup>1234</sup>        | Analgesic | 583 | Ibafloxacin <sup>1234</sup>    | Antibacterial |
| 74 | Ethylmorphine <sup>1234</sup>        | Analgesic | 584 | Iclaprim <sup>1234</sup>       | Antibacterial |
| 75 | Etidocaine <sup>1</sup>              | Analgesic | 585 | Imipenem <sup>1234</sup>       | Antibacterial |
| 76 | Etodolac <sup>1234</sup>             | Analgesic | 586 | Isepamicin <sup>1234</sup>     | Antibacterial |
| 77 | Etofenamate <sup>1234</sup>          | Analgesic | 587 | Isoniazid <sup>1234</sup>      | Antibacterial |
| 78 | Etoricoxib <sup>1234</sup>           | Analgesic | 588 | Josamycin <sup>1234</sup>      | Antibacterial |
| 79 | Eugenol <sup>12</sup>                | Analgesic | 589 | Kanamycin <sup>1234</sup>      | Antibacterial |
| 80 | Fenbufen <sup>1234</sup>             | Analgesic | 590 | Latamoxef <sup>1234</sup>      | Antibacterial |
| 81 | Fenoprofen <sup>1234</sup>           | Analgesic | 591 | Lefamulin <sup>1234</sup>      | Antibacterial |
| 82 | Fentanyl <sup>12</sup>               | Analgesic | 592 | Lincomycin <sup>1234</sup>     | Antibacterial |
| 83 | Fentiazac <sup>1234</sup>            | Analgesic | 593 | Linezolid <sup>1234</sup>      | Antibacterial |
| 84 | Feprazone <sup>1234</sup>            | Analgesic | 594 | Lomefloxacin <sup>1234</sup>   | Antibacterial |
| 85 | Floctafenine <sup>1234</sup>         | Analgesic | 595 | Loracarbef <sup>1234</sup>     | Antibacterial |
| 86 | Flufenamic acid <sup>1234</sup>      | Analgesic | 596 | Lymecycline <sup>1234</sup>    | Antibacterial |
| 87 | Flumetroxone <sup>1234</sup>         | Analgesic | 597 | Mandelic acid <sup>1234</sup>  | Antibacterial |
| 88 | Flunoxaprofen <sup>1234</sup>        | Analgesic | 598 | Marbofloxacin <sup>123</sup>   | Antibacterial |
| 89 | Flupirtine <sup>1234</sup>           | Analgesic | 599 | Meclocycline <sup>1234</sup>   | Antibacterial |
| 90 | Fluproquazone <sup>123</sup>         | Analgesic | 600 | Meropenem <sup>1234</sup>      | Antibacterial |
| 91 | Flurbiprofen <sup>1234</sup>         | Analgesic | 601 | Metacycline <sup>1234</sup>    | Antibacterial |
| 92 | Frovatriptan <sup>1234</sup>         | Analgesic | 602 | Metampicillin <sup>1234</sup>  | Antibacterial |
| 93 | Funapide <sup>12</sup>               | Analgesic | 603 | Methenamine <sup>123</sup>     | Antibacterial |
| 94 | Gabapentin <sup>1234</sup>           | Analgesic | 604 | Methicillin <sup>1234</sup>    | Antibacterial |
| 95 | Gabapentin enacarbil <sup>1234</sup> | Analgesic | 605 | Metronidazole <sup>1234</sup>  | Antibacterial |
| 96 | Glafenine <sup>1234</sup>            | Analgesic | 606 | Mezlocillin <sup>1234</sup>    | Antibacterial |
| 97 | Guacetisal <sup>1234</sup>           | Analgesic | 607 | Midecamycin <sup>1234</sup>    | Antibacterial |
| 98 | Halothane <sup>1</sup>               | Analgesic | 608 | Minocycline <sup>1234</sup>    | Antibacterial |
| 99 | Hydrocodone <sup>1234</sup>          | Analgesic | 609 | Miocamycin <sup>1234</sup>     | Antibacterial |

|     |                                      |           |     |                                         |               |
|-----|--------------------------------------|-----------|-----|-----------------------------------------|---------------|
| 100 | Hydromorphinol <sup>1234</sup>       | Analgesic | 610 | Moxifloxacin <sup>1234</sup>            | Antibacterial |
| 101 | Hydromorphone <sup>1234</sup>        | Analgesic | 611 | Mupirocin <sup>1234</sup>               | Antibacterial |
| 102 | Ibuprofen <sup>1234</sup>            | Analgesic | 612 | Nadifloxacin <sup>1234</sup>            | Antibacterial |
| 103 | Indometacin <sup>1234</sup>          | Analgesic | 613 | Nafcillin <sup>1234</sup>               | Antibacterial |
| 104 | Indomethacin farnesil <sup>123</sup> | Analgesic | 614 | Nalidixic acid <sup>1234</sup>          | Antibacterial |
| 105 | Indoprofen <sup>1234</sup>           | Analgesic | 615 | Nemonoxacin <sup>1234</sup>             | Antibacterial |
| 106 | Iprazochrome <sup>1234</sup>         | Analgesic | 616 | Netilmicin <sup>1234</sup>              | Antibacterial |
| 107 | Isoflurane <sup>12</sup>             | Analgesic | 617 | Nifurtinol <sup>1234</sup>              | Antibacterial |
| 108 | Kebuzone <sup>1234</sup>             | Analgesic | 618 | Nitrofurantoin <sup>1234</sup>          | Antibacterial |
| 109 | Ketamine <sup>12</sup>               | Analgesic | 619 | Nitroxoline <sup>1234</sup>             | Antibacterial |
| 110 | Ketobemidone <sup>1234</sup>         | Analgesic | 620 | Nocardin A <sup>1234</sup>              | Antibacterial |
| 111 | Ketorolac <sup>1234</sup>            | Analgesic | 621 | Norfloxacin <sup>1234</sup>             | Antibacterial |
| 112 | Lacosamide <sup>1</sup>              | Analgesic | 622 | Nourseothricin <sup>12</sup>            | Antibacterial |
| 113 | Levorphanol <sup>1234</sup>          | Analgesic | 623 | Novobiocin <sup>1234</sup>              | Antibacterial |
| 114 | Lisuride <sup>12</sup>               | Analgesic | 624 | Oleandomycin <sup>123</sup>             | Antibacterial |
| 115 | Lofentanil <sup>1234</sup>           | Analgesic | 625 | Omadacycline <sup>1234</sup>            | Antibacterial |
| 116 | Lonazolac <sup>1234</sup>            | Analgesic | 626 | Orbifloxacin <sup>123</sup>             | Antibacterial |
| 117 | Lornoxicam <sup>1234</sup>           | Analgesic | 627 | Oritavancin <sup>1234</sup>             | Antibacterial |
| 118 | Loxoprofen <sup>1234</sup>           | Analgesic | 628 | Ornidazole <sup>1234</sup>              | Antibacterial |
| 119 | Lumiracoxib <sup>1234</sup>          | Analgesic | 629 | Oxacillin <sup>1234</sup>               | Antibacterial |
| 120 | Meclofenamic acid <sup>1234</sup>    | Analgesic | 630 | Oxolinic acid <sup>12</sup>             | Antibacterial |
| 121 | Mefenamic acid <sup>1234</sup>       | Analgesic | 631 | Oxytetracycline <sup>1234</sup>         | Antibacterial |
| 122 | Meloxicam <sup>1234</sup>            | Analgesic | 632 | Ozenoxacin <sup>1234</sup>              | Antibacterial |
| 123 | Menthol <sup>123</sup>               | Analgesic | 633 | Panipenem <sup>1234</sup>               | Antibacterial |
| 124 | Meperidine <sup>1234</sup>           | Analgesic | 634 | Paromomycin <sup>1234</sup>             | Antibacterial |
| 125 | Mephenoxalone <sup>12</sup>          | Analgesic | 635 | Pazufloxacin <sup>1234</sup>            | Antibacterial |
| 126 | Mepivacaine <sup>1</sup>             | Analgesic | 636 | Pefloxacin <sup>1234</sup>              | Antibacterial |
| 127 | Meptazinol <sup>1234</sup>           | Analgesic | 637 | Penamocillin <sup>1234</sup>            | Antibacterial |
| 128 | Metabutethamine <sup>1</sup>         | Analgesic | 638 | Pheneticillin <sup>1234</sup>           | Antibacterial |
| 129 | Metamizole <sup>1234</sup>           | Analgesic | 639 | Phenoxymethylpenicillin <sup>1234</sup> | Antibacterial |
| 130 | Metethoheptazine <sup>1234</sup>     | Analgesic | 640 | Pipemidic acid <sup>12</sup>            | Antibacterial |
| 131 | Methadone <sup>1234</sup>            | Analgesic | 641 | Piperacillin <sup>1234</sup>            | Antibacterial |
| 132 | Metheptazine <sup>1234</sup>         | Analgesic | 642 | Pirlimycin <sup>123</sup>               | Antibacterial |
| 133 | Methocarbamol <sup>123</sup>         | Analgesic | 643 | Piromidic acid <sup>1234</sup>          | Antibacterial |
| 134 | Methoxyflurane <sup>123</sup>        | Analgesic | 644 | Pivampicillin <sup>1234</sup>           | Antibacterial |
| 135 | Methyl salicylate <sup>1234</sup>    | Analgesic | 645 | Pivmecillinam <sup>1234</sup>           | Antibacterial |
| 136 | Methysergide <sup>123</sup>          | Analgesic | 646 | Plazomicin <sup>1234</sup>              | Antibacterial |
| 137 | Metopon <sup>1234</sup>              | Analgesic | 647 | Polymyxin B <sup>1234</sup>             | Antibacterial |
| 138 | Mirogabalin <sup>1234</sup>          | Analgesic | 648 | Posizolid <sup>1234</sup>               | Antibacterial |
| 139 | Mioprofen <sup>1234</sup>            | Analgesic | 649 | Pradofloxacin <sup>123</sup>            | Antibacterial |
| 140 | Mofebutazone <sup>1234</sup>         | Analgesic | 650 | Prontosil <sup>1234</sup>               | Antibacterial |
| 141 | Morniflumate <sup>1234</sup>         | Analgesic | 651 | Propicillin <sup>1234</sup>             | Antibacterial |
| 142 | Morphine <sup>1234</sup>             | Analgesic | 652 | Prulifloxacin <sup>1234</sup>           | Antibacterial |
| 143 | Morpholine <sup>12</sup>             | Analgesic | 653 | Puromycin <sup>12</sup>                 | Antibacterial |
| 144 | Nabilone <sup>12</sup>               | Analgesic | 654 | Quinupristin <sup>123</sup>             | Antibacterial |
| 145 | Nabumetone <sup>1234</sup>           | Analgesic | 655 | Radezolid <sup>1234</sup>               | Antibacterial |
| 146 | Nalbuphine <sup>1234</sup>           | Analgesic | 656 | Ranbezolid <sup>123</sup>               | Antibacterial |
| 147 | Naproxen <sup>1234</sup>             | Analgesic | 657 | Relebactam <sup>1234</sup>              | Antibacterial |
| 148 | Naratriptan <sup>1234</sup>          | Analgesic | 658 | Retapamulin <sup>1234</sup>             | Antibacterial |
| 149 | Nefopam <sup>1234</sup>              | Analgesic | 659 | Ribostamycin <sup>1234</sup>            | Antibacterial |
| 150 | Nefopam <sup>1234</sup>              | Analgesic | 660 | Rifabutin <sup>1234</sup>               | Antibacterial |
| 151 | NFEPP <sup>1234</sup>                | Analgesic | 661 | Rifalazil <sup>1234</sup>               | Antibacterial |
| 152 | Nicocodeine <sup>1234</sup>          | Analgesic | 662 | Rifamycin <sup>1234</sup>               | Antibacterial |
| 153 | Nicodicodine <sup>1234</sup>         | Analgesic | 663 | Rifapentine <sup>1234</sup>             | Antibacterial |
| 154 | Nicomorphine <sup>1234</sup>         | Analgesic | 664 | Rifaximin <sup>1234</sup>               | Antibacterial |
| 155 | Nifenazone <sup>1234</sup>           | Analgesic | 665 | Ritipenem <sup>1234</sup>               | Antibacterial |
| 156 | Niflumic acid <sup>1234</sup>        | Analgesic | 666 | Rokitamycin <sup>1234</sup>             | Antibacterial |

|     |                                 |           |     |                                        |               |
|-----|---------------------------------|-----------|-----|----------------------------------------|---------------|
| 157 | Nimesulide <sup>1234</sup>      | Analgesic | 667 | Rolitetracycline <sup>1234</sup>       | Antibacterial |
| 158 | Nitrous Oxide <sup>12</sup>     | Analgesic | 668 | Rosoxacin <sup>1234</sup>              | Antibacterial |
| 159 | Norpipanone <sup>1234</sup>     | Analgesic | 669 | Roxithromycin <sup>1234</sup>          | Antibacterial |
| 160 | Nortilidine <sup>1234</sup>     | Analgesic | 670 | Rufloxacin <sup>1234</sup>             | Antibacterial |
| 161 | Orphenadrine <sup>123</sup>     | Analgesic | 671 | Sarafloxacin <sup>123</sup>            | Antibacterial |
| 162 | Oxametacin <sup>123</sup>       | Analgesic | 672 | Sarecycline <sup>1234</sup>            | Antibacterial |
| 163 | Oxaprozin <sup>1234</sup>       | Analgesic | 673 | Sisomicin <sup>1234</sup>              | Antibacterial |
| 164 | Oxetorone <sup>1234</sup>       | Analgesic | 674 | Sitafloxacin <sup>1234</sup>           | Antibacterial |
| 165 | Oxycodone <sup>1234</sup>       | Analgesic | 675 | Solithromycin <sup>1234</sup>          | Antibacterial |
| 166 | Oxymorphone <sup>1234</sup>     | Analgesic | 676 | Sparfloxacin <sup>1234</sup>           | Antibacterial |
| 167 | Oxyphenbutazone <sup>1234</sup> | Analgesic | 677 | Spectinomycin <sup>1234</sup>          | Antibacterial |
| 168 | Parecoxib <sup>1234</sup>       | Analgesic | 678 | Spiramycin <sup>1234</sup>             | Antibacterial |
| 169 | Pentazocine <sup>123</sup>      | Analgesic | 679 | Streptomycin <sup>1234</sup>           | Antibacterial |
| 170 | PF-05089771 <sup>1234</sup>     | Analgesic | 680 | Sulbactam <sup>1234</sup>              | Antibacterial |
| 171 | Phenacetin <sup>1234</sup>      | Analgesic | 681 | Sulbenicillin <sup>1234</sup>          | Antibacterial |
| 172 | Phenadoxone <sup>1234</sup>     | Analgesic | 682 | Sulfacetamide <sup>1234</sup>          | Antibacterial |
| 173 | Phenazocine <sup>1234</sup>     | Analgesic | 683 | Sulfadiazine <sup>1234</sup>           | Antibacterial |
| 174 | Phenazopyridine <sup>123</sup>  | Analgesic | 684 | Sulfadicramide <sup>123</sup>          | Antibacterial |
| 175 | Phenol <sup>12</sup>            | Analgesic | 685 | Sulfadimethoxine <sup>1234</sup>       | Antibacterial |
| 176 | Phenoperidine <sup>1234</sup>   | Analgesic | 686 | Sulfadimidine <sup>1234</sup>          | Antibacterial |
| 177 | Phenylbutazone <sup>1234</sup>  | Analgesic | 687 | Sulfadoxine <sup>1234</sup>            | Antibacterial |
| 178 | Piminodine <sup>1234</sup>      | Analgesic | 688 | Sulfafurazole <sup>1234</sup>          | Antibacterial |
| 179 | Piperocaine <sup>1</sup>        | Analgesic | 689 | Sulfaisodimidine <sup>1234</sup>       | Antibacterial |
| 180 | Piritramide <sup>1234</sup>     | Analgesic | 690 | Sulfalene <sup>1234</sup>              | Antibacterial |
| 181 | Piroxicam <sup>1234</sup>       | Analgesic | 691 | Sulfamazone <sup>12</sup>              | Antibacterial |
| 182 | Pirprofen <sup>1234</sup>       | Analgesic | 692 | Sulfamerazine <sup>1234</sup>          | Antibacterial |
| 183 | Pizotifen <sup>123</sup>        | Analgesic | 693 | Sulfameter <sup>1234</sup>             | Antibacterial |
| 184 | Pregabalin <sup>123</sup>       | Analgesic | 694 | Sulfamethizole <sup>1234</sup>         | Antibacterial |
| 185 | Prilocaine <sup>12</sup>        | Analgesic | 695 | Sulfamethoxazole <sup>1234</sup>       | Antibacterial |
| 186 | Procaine <sup>12</sup>          | Analgesic | 696 | Sulfamethoxypyridazine <sup>1234</sup> | Antibacterial |
| 187 | Proglumetacin <sup>1234</sup>   | Analgesic | 697 | Sulfametomidine <sup>1234</sup>        | Antibacterial |
| 188 | Proglumide <sup>123</sup>       | Analgesic | 698 | Sulfametrole <sup>1234</sup>           | Antibacterial |
| 189 | Proheptazine <sup>1234</sup>    | Analgesic | 699 | Sulfamoxole <sup>1234</sup>            | Antibacterial |
| 190 | Propacetamol <sup>1234</sup>    | Analgesic | 700 | Sulfanilamide <sup>1234</sup>          | Antibacterial |
| 191 | Proparacaine <sup>1</sup>       | Analgesic | 701 | Sulfanitran <sup>123</sup>             | Antibacterial |
| 192 | Propiram <sup>1234</sup>        | Analgesic | 702 | Sulfaperin <sup>1234</sup>             | Antibacterial |
| 193 | Propoxycaine <sup>1</sup>       | Analgesic | 703 | Sulfaphenazole <sup>1234</sup>         | Antibacterial |
| 194 | Propyphenazone <sup>1234</sup>  | Analgesic | 704 | Sulfapyridine <sup>1234</sup>          | Antibacterial |
| 195 | Proquazone <sup>1234</sup>      | Analgesic | 705 | Sulfathiazole <sup>1234</sup>          | Antibacterial |
| 196 | Proxibarbal <sup>123</sup>      | Analgesic | 706 | Sulfathiourea <sup>1234</sup>          | Antibacterial |
| 197 | Remifentanil <sup>1</sup>       | Analgesic | 707 | Sultamicillin <sup>1234</sup>          | Antibacterial |
| 198 | Rimazolium <sup>1234</sup>      | Analgesic | 708 | Sutezolid <sup>1234</sup>              | Antibacterial |
| 199 | Rizatriptan <sup>123</sup>      | Analgesic | 709 | Talampicillin <sup>1234</sup>          | Antibacterial |
| 200 | Rofecoxib <sup>1234</sup>       | Analgesic | 710 | Tazobactam <sup>1234</sup>             | Antibacterial |
| 201 | Ropivacaine <sup>123</sup>      | Analgesic | 711 | Tebipenem pivoxil <sup>1234</sup>      | Antibacterial |
| 202 | Salicin <sup>1234</sup>         | Analgesic | 712 | Tedizolid <sup>1234</sup>              | Antibacterial |
| 203 | Salicylamide <sup>1234</sup>    | Analgesic | 713 | Telavancin <sup>1234</sup>             | Antibacterial |
| 204 | Salsalate <sup>1234</sup>       | Analgesic | 714 | Telithromycin <sup>1234</sup>          | Antibacterial |
| 205 | Saxitoxin <sup>1</sup>          | Analgesic | 715 | Temafloxacin <sup>1234</sup>           | Antibacterial |
| 206 | Sevoflurane <sup>12</sup>       | Analgesic | 716 | Temocillin <sup>1234</sup>             | Antibacterial |
| 207 | Spilanthol <sup>12</sup>        | Analgesic | 717 | Tetracycline <sup>1234</sup>           | Antibacterial |
| 208 | Sufentanil <sup>12</sup>        | Analgesic | 718 | Tetroxoprim <sup>1234</sup>            | Antibacterial |
| 209 | Sulindac <sup>1234</sup>        | Analgesic | 719 | Thiamphenicol <sup>1234</sup>          | Antibacterial |
| 210 | Sumatriptan <sup>1234</sup>     | Analgesic | 720 | Tiamulin <sup>123</sup>                | Antibacterial |
| 211 | Suprofen <sup>1234</sup>        | Analgesic | 721 | Ticarcillin <sup>1234</sup>            | Antibacterial |
| 212 | Tapentadol <sup>1234</sup>      | Analgesic | 722 | Tigecycline <sup>1234</sup>            | Antibacterial |
| 213 | Tenoxicam <sup>1234</sup>       | Analgesic | 723 | Tigemonam <sup>1234</sup>              | Antibacterial |

|     |                                     |                |     |                                         |               |
|-----|-------------------------------------|----------------|-----|-----------------------------------------|---------------|
| 214 | Tetracaine <sup>12</sup>            | Analgesic      | 724 | Tinidazole <sup>1234</sup>              | Antibacterial |
| 215 | Tetrodotoxin <sup>123</sup>         | Analgesic      | 725 | Tobramycin <sup>1234</sup>              | Antibacterial |
| 216 | Thebacon <sup>1234</sup>            | Analgesic      | 726 | Tosufloxacin <sup>1234</sup>            | Antibacterial |
| 217 | Thiopental <sup>12</sup>            | Analgesic      | 727 | Trimethoprim <sup>1234</sup>            | Antibacterial |
| 218 | Tiaprofenic acid <sup>1234</sup>    | Analgesic      | 728 | Troleandomycin <sup>1234</sup>          | Antibacterial |
| 219 | Tilidine <sup>1234</sup>            | Analgesic      | 729 | Trovaflaxacin <sup>1234</sup>           | Antibacterial |
| 220 | Tolfenamic acid <sup>1234</sup>     | Analgesic      | 730 | Tyrothricin <sup>1234</sup>             | Antibacterial |
| 221 | Tolmetin <sup>1234</sup>            | Analgesic      | 731 | Vaborbactam <sup>1234</sup>             | Antibacterial |
| 222 | Tramadol <sup>1234</sup>            | Analgesic      | 732 | Valnemulin <sup>1234</sup>              | Antibacterial |
| 223 | Trichloroethylene <sup>12</sup>     | Analgesic      | 733 | Vancomycin <sup>1234</sup>              | Antibacterial |
| 224 | Trimecaine <sup>12</sup>            | Analgesic      | 734 | Verdamicin <sup>1234</sup>              | Antibacterial |
| 225 | Valdecobix <sup>1234</sup>          | Analgesic      | 735 | Xibornol <sup>123</sup>                 | Antibacterial |
| 226 | Viminol <sup>1234</sup>             | Analgesic      | 736 | Abacavir <sup>1234</sup>                | Antiviral     |
| 227 | Zolmitriptan <sup>1234</sup>        | Analgesic      | 737 | Aciclovir <sup>1234</sup>               | Antiviral     |
| 228 | Zomepirac <sup>1234</sup>           | Analgesic      | 738 | Adefovir <sup>12</sup>                  | Antiviral     |
| 229 | Abemaciclib <sup>1234</sup>         | Antineoplastic | 739 | Adefovir dipivoxil <sup>1234</sup>      | Antiviral     |
| 230 | Acalabrutinib <sup>1234</sup>       | Antineoplastic | 740 | Amdoxovir <sup>1234</sup>               | Antiviral     |
| 231 | Aclarubicin <sup>12</sup>           | Antineoplastic | 741 | Amenamavir <sup>1234</sup>              | Antiviral     |
| 232 | Afatinib <sup>1234</sup>            | Antineoplastic | 742 | Amprenavir <sup>1234</sup>              | Antiviral     |
| 233 | Alectinib <sup>1234</sup>           | Antineoplastic | 743 | Apricitabine <sup>1234</sup>            | Antiviral     |
| 234 | Alpelisib <sup>1234</sup>           | Antineoplastic | 744 | Asunaprevir <sup>1234</sup>             | Antiviral     |
| 235 | Altretamine <sup>1234</sup>         | Antineoplastic | 745 | Atazanavir <sup>1234</sup>              | Antiviral     |
| 236 | Alvocidib <sup>123</sup>            | Antineoplastic | 746 | Baloxavir marboxil <sup>1234</sup>      | Antiviral     |
| 237 | Aminolevulinic acid <sup>1234</sup> | Antineoplastic | 747 | Bevirimat <sup>1234</sup>               | Antiviral     |
| 238 | Aminopropionitrile <sup>1234</sup>  | Antineoplastic | 748 | BI 224436 <sup>1234</sup>               | Antiviral     |
| 239 | Aminopterin <sup>1234</sup>         | Antineoplastic | 749 | Bictegravir <sup>1234</sup>             | Antiviral     |
| 240 | Amrubicin <sup>12</sup>             | Antineoplastic | 750 | BIT225 <sup>1234</sup>                  | Antiviral     |
| 241 | Amsacrine <sup>1234</sup>           | Antineoplastic | 751 | BMS-955176 <sup>1234</sup>              | Antiviral     |
| 242 | Anagrelide <sup>1234</sup>          | Antineoplastic | 752 | Boceprevir <sup>1234</sup>              | Antiviral     |
| 243 | Asparagine <sup>1</sup>             | Antineoplastic | 753 | Brivudine <sup>1234</sup>               | Antiviral     |
| 244 | Atrasentan <sup>12</sup>            | Antineoplastic | 754 | Cabotegravir <sup>1234</sup>            | Antiviral     |
| 245 | Axitinib <sup>1234</sup>            | Antineoplastic | 755 | Calanolide A <sup>1234</sup>            | Antiviral     |
| 246 | Azacitidine <sup>1234</sup>         | Antineoplastic | 756 | Cenicriviroc <sup>12</sup>              | Antiviral     |
| 247 | Baricitinib <sup>1234</sup>         | Antineoplastic | 757 | Censavudine <sup>1234</sup>             | Antiviral     |
| 248 | Belinostat <sup>1234</sup>          | Antineoplastic | 758 | Cidofovir <sup>1234</sup>               | Antiviral     |
| 249 | Belotecan <sup>1234</sup>           | Antineoplastic | 759 | Clevudine <sup>1234</sup>               | Antiviral     |
| 250 | Bendamustine <sup>1234</sup>        | Antineoplastic | 760 | Daclatasvir <sup>1234</sup>             | Antiviral     |
| 251 | Bexarotene <sup>1234</sup>          | Antineoplastic | 761 | Darunavir <sup>1234</sup>               | Antiviral     |
| 252 | Binimetinib <sup>1234</sup>         | Antineoplastic | 762 | Dasabuvir <sup>1234</sup>               | Antiviral     |
| 253 | Bleomycin <sup>12</sup>             | Antineoplastic | 763 | Delavirdine <sup>1234</sup>             | Antiviral     |
| 254 | Bortezomib <sup>1234</sup>          | Antineoplastic | 764 | Didanosine <sup>1234</sup>              | Antiviral     |
| 255 | Bosutinib <sup>1234</sup>           | Antineoplastic | 765 | Docosanol <sup>1234</sup>               | Antiviral     |
| 256 | Brigatinib <sup>1234</sup>          | Antineoplastic | 766 | Dolutegravir <sup>1234</sup>            | Antiviral     |
| 257 | Busulfan <sup>1234</sup>            | Antineoplastic | 767 | Doravirine <sup>1234</sup>              | Antiviral     |
| 258 | Cabazitaxel <sup>1234</sup>         | Antineoplastic | 768 | Edoxudine <sup>1234</sup>               | Antiviral     |
| 259 | Cabozantinib <sup>1234</sup>        | Antineoplastic | 769 | Efavirenz <sup>1234</sup>               | Antiviral     |
| 260 | Camptothecin <sup>1234</sup>        | Antineoplastic | 770 | Elbasvir <sup>1234</sup>                | Antiviral     |
| 261 | Capecitabine <sup>1234</sup>        | Antineoplastic | 771 | Elvitegravir <sup>1234</sup>            | Antiviral     |
| 262 | Carboquone <sup>123</sup>           | Antineoplastic | 772 | Elvucitabine <sup>1234</sup>            | Antiviral     |
| 263 | Carfilzomib <sup>1234</sup>         | Antineoplastic | 773 | Emtricitabine <sup>1234</sup>           | Antiviral     |
| 264 | Carmofur <sup>1234</sup>            | Antineoplastic | 774 | Entecavir <sup>1234</sup>               | Antiviral     |
| 265 | Carmustine <sup>1234</sup>          | Antineoplastic | 775 | Epigallocatechin gallate <sup>123</sup> | Antiviral     |
| 266 | Cediranib <sup>1234</sup>           | Antineoplastic | 776 | Etravirine <sup>1234</sup>              | Antiviral     |
| 267 | Ceritinib <sup>1234</sup>           | Antineoplastic | 777 | Faldaprevir <sup>1234</sup>             | Antiviral     |
| 268 | Chlorambucil <sup>1234</sup>        | Antineoplastic | 778 | Famciclovir <sup>1234</sup>             | Antiviral     |
| 269 | Chlormethine <sup>1234</sup>        | Antineoplastic | 779 | Favipiravir <sup>1234</sup>             | Antiviral     |
| 270 | Cladribine <sup>1234</sup>          | Antineoplastic | 780 | Filiciclovir <sup>1234</sup>            | Antiviral     |

|     |                                        |                |     |                                       |           |
|-----|----------------------------------------|----------------|-----|---------------------------------------|-----------|
| 271 | Clofarabine <sup>1234</sup>            | Antineoplastic | 781 | Fosamprenavir <sup>1234</sup>         | Antiviral |
| 272 | Cobimetinib <sup>1234</sup>            | Antineoplastic | 782 | Foscarnet <sup>1234</sup>             | Antiviral |
| 273 | Copanlisib <sup>1234</sup>             | Antineoplastic | 783 | Fosdevirine <sup>1234</sup>           | Antiviral |
| 274 | Cositecan <sup>1234</sup>              | Antineoplastic | 784 | Fostemsavir <sup>1234</sup>           | Antiviral |
| 275 | Crizotinib <sup>1234</sup>             | Antineoplastic | 785 | Ganciclovir <sup>1234</sup>           | Antiviral |
| 276 | Cyclophosphamide <sup>1234</sup>       | Antineoplastic | 786 | Grazoprevir <sup>1234</sup>           | Antiviral |
| 277 | Dabrafenib <sup>1234</sup>             | Antineoplastic | 787 | Idoxuridine <sup>1234</sup>           | Antiviral |
| 278 | Dacarbazine <sup>1234</sup>            | Antineoplastic | 788 | Imiquimod <sup>1234</sup>             | Antiviral |
| 279 | Dacomitinib <sup>1234</sup>            | Antineoplastic | 789 | Indinavir <sup>1234</sup>             | Antiviral |
| 280 | Dactinomycin <sup>12</sup>             | Antineoplastic | 790 | Islatravir <sup>1234</sup>            | Antiviral |
| 281 | Dasatinib <sup>1234</sup>              | Antineoplastic | 791 | KP-1461 <sup>1234</sup>               | Antiviral |
| 282 | Daunorubicin <sup>123</sup>            | Antineoplastic | 792 | Lamivudine <sup>1234</sup>            | Antiviral |
| 283 | Decitabine <sup>1234</sup>             | Antineoplastic | 793 | Laninamivir <sup>1234</sup>           | Antiviral |
| 284 | Demecolcine <sup>12</sup>              | Antineoplastic | 794 | Letermovir <sup>1234</sup>            | Antiviral |
| 285 | Docetaxel <sup>1234</sup>              | Antineoplastic | 795 | Lobucavir <sup>1234</sup>             | Antiviral |
| 286 | Doxifluridine <sup>1234</sup>          | Antineoplastic | 796 | Lopinavir <sup>1234</sup>             | Antiviral |
| 287 | Elesclomol <sup>1234</sup>             | Antineoplastic | 797 | Maraviroc <sup>1234</sup>             | Antiviral |
| 288 | Elsamitucin <sup>12</sup>              | Antineoplastic | 798 | Maribavir <sup>1234</sup>             | Antiviral |
| 289 | Enasidenib <sup>1234</sup>             | Antineoplastic | 799 | Methisazone <sup>1234</sup>           | Antiviral |
| 290 | Encorafenib <sup>1234</sup>            | Antineoplastic | 800 | Miltefosine <sup>12</sup>             | Antiviral |
| 291 | Entinostat <sup>1234</sup>             | Antineoplastic | 801 | MK-2048 <sup>1234</sup>               | Antiviral |
| 292 | Entrectinib <sup>1234</sup>            | Antineoplastic | 802 | Moroxydine <sup>1234</sup>            | Antiviral |
| 293 | Epacadostat <sup>1234</sup>            | Antineoplastic | 803 | Nelfinavir <sup>1234</sup>            | Antiviral |
| 294 | Erdafitinib <sup>1234</sup>            | Antineoplastic | 804 | Nevirapine <sup>1234</sup>            | Antiviral |
| 295 | Eribulin <sup>1234</sup>               | Antineoplastic | 805 | Oseltamivir <sup>1234</sup>           | Antiviral |
| 296 | Erlotinib <sup>1234</sup>              | Antineoplastic | 806 | Penciclovir <sup>1234</sup>           | Antiviral |
| 297 | Estramustine <sup>1234</sup>           | Antineoplastic | 807 | Ingavirin <sup>1234</sup>             | Antiviral |
| 298 | Estramustine phosphate <sup>1234</sup> | Antineoplastic | 808 | Peramivir <sup>1234</sup>             | Antiviral |
| 299 | Etoglucid <sup>123</sup>               | Antineoplastic | 809 | Phosphonoacetate <sup>1234</sup>      | Antiviral |
| 300 | Etoposide <sup>1234</sup>              | Antineoplastic | 810 | Pleconaril <sup>1234</sup>            | Antiviral |
| 301 | Everolimus <sup>1234</sup>             | Antineoplastic | 811 | Podophyllotoxin <sup>12</sup>         | Antiviral |
| 302 | Exatecan <sup>1234</sup>               | Antineoplastic | 812 | Raltegravir <sup>1234</sup>           | Antiviral |
| 303 | Fedratinib <sup>1234</sup>             | Antineoplastic | 813 | Remdesivir <sup>1234</sup>            | Antiviral |
| 304 | Filgotinib <sup>1234</sup>             | Antineoplastic | 814 | Resiquimod <sup>12</sup>              | Antiviral |
| 305 | Floxuridine <sup>1234</sup>            | Antineoplastic | 815 | Ribavirin <sup>1234</sup>             | Antiviral |
| 306 | Fludarabine <sup>1234</sup>            | Antineoplastic | 816 | Rilpivirine <sup>1234</sup>           | Antiviral |
| 307 | Fluorouracil <sup>1234</sup>           | Antineoplastic | 817 | Rimantadine <sup>1234</sup>           | Antiviral |
| 308 | Fotemustine <sup>1234</sup>            | Antineoplastic | 818 | Ritonavir <sup>1234</sup>             | Antiviral |
| 309 | Gefitinib <sup>1234</sup>              | Antineoplastic | 819 | Saquinavir <sup>1234</sup>            | Antiviral |
| 310 | Gemcitabine <sup>1234</sup>            | Antineoplastic | 820 | Simeprevir <sup>1234</sup>            | Antiviral |
| 311 | Gilteritinib <sup>1234</sup>           | Antineoplastic | 821 | Sofosbuvir <sup>1234</sup>            | Antiviral |
| 312 | Gimatecan <sup>123</sup>               | Antineoplastic | 822 | Sorivudine <sup>1234</sup>            | Antiviral |
| 313 | Hydroxyurea <sup>1234</sup>            | Antineoplastic | 823 | Stampidine <sup>123</sup>             | Antiviral |
| 314 | Ibrutinib <sup>1234</sup>              | Antineoplastic | 824 | Stavudine <sup>1234</sup>             | Antiviral |
| 315 | Icotinib <sup>1234</sup>               | Antineoplastic | 825 | Taribavirin <sup>1234</sup>           | Antiviral |
| 316 | Idarubicin <sup>12</sup>               | Antineoplastic | 826 | Tecovirimat <sup>1234</sup>           | Antiviral |
| 317 | Idelalisib <sup>1234</sup>             | Antineoplastic | 827 | Telaprevir <sup>1234</sup>            | Antiviral |
| 318 | Ifosfamide <sup>1234</sup>             | Antineoplastic | 828 | Telbivudine <sup>1234</sup>           | Antiviral |
| 319 | Imatinib <sup>1234</sup>               | Antineoplastic | 829 | Tenofovir <sup>1234</sup>             | Antiviral |
| 320 | Infigratinib <sup>1234</sup>           | Antineoplastic | 830 | Tenofovir alafenamide <sup>1234</sup> | Antiviral |
| 321 | Irinotecan <sup>1234</sup>             | Antineoplastic | 831 | Tenofovir disoproxil <sup>1234</sup>  | Antiviral |
| 322 | Ivosidenib <sup>1234</sup>             | Antineoplastic | 832 | Tilorone <sup>12</sup>                | Antiviral |
| 323 | Ixabepilone <sup>12</sup>              | Antineoplastic | 833 | Tipranavir <sup>1234</sup>            | Antiviral |
| 324 | Ixazomib <sup>1234</sup>               | Antineoplastic | 834 | TMC-310911 <sup>1234</sup>            | Antiviral |
| 325 | Lapatinib <sup>1234</sup>              | Antineoplastic | 835 | Trifluridine <sup>1234</sup>          | Antiviral |
| 326 | Larotaxel <sup>123</sup>               | Antineoplastic | 836 | Tromantadine <sup>1234</sup>          | Antiviral |
| 327 | Larotrectinib <sup>1234</sup>          | Antineoplastic | 837 | Umifenovir <sup>1234</sup>            | Antiviral |

|     |                                |                |     |                                           |            |
|-----|--------------------------------|----------------|-----|-------------------------------------------|------------|
| 328 | Lenvatinib <sup>1234</sup>     | Antineoplastic | 838 | Valaciclovir <sup>1234</sup>              | Antiviral  |
| 329 | Lestaurtinib <sup>1234</sup>   | Antineoplastic | 839 | Valganciclovir <sup>1234</sup>            | Antiviral  |
| 330 | Lomustine <sup>1234</sup>      | Antineoplastic | 840 | Vicriviroc <sup>123</sup>                 | Antiviral  |
| 331 | Lonidamine <sup>1234</sup>     | Antineoplastic | 841 | Zalcitabine <sup>1234</sup>               | Antiviral  |
| 332 | Lorlatinib <sup>1234</sup>     | Antineoplastic | 842 | Zanamivir <sup>1234</sup>                 | Antiviral  |
| 333 | Losoxantrone <sup>12</sup>     | Antineoplastic | 843 | Zidovudine <sup>1234</sup>                | Antiviral  |
| 334 | Lucanthone <sup>1</sup>        | Antineoplastic | 844 | Abafungin <sup>1234</sup>                 | Antifungal |
| 335 | Lurtotecan <sup>1234</sup>     | Antineoplastic | 845 | Albaconazole <sup>1234</sup>              | Antifungal |
| 336 | Mannosulfan <sup>123</sup>     | Antineoplastic | 846 | Amorolfine <sup>1234</sup>                | Antifungal |
| 337 | Masitinib <sup>123</sup>       | Antineoplastic | 847 | Amphotericin B <sup>1234</sup>            | Antifungal |
| 338 | Masoprocol <sup>1234</sup>     | Antineoplastic | 848 | Anidulafungin <sup>1234</sup>             | Antifungal |
| 339 | Melphalan <sup>1234</sup>      | Antineoplastic | 849 | Atovaquone <sup>1234</sup>                | Antifungal |
| 340 | Mercaptopurine <sup>1234</sup> | Antineoplastic | 850 | Bifonazole <sup>1234</sup>                | Antifungal |
| 341 | Methotrexate <sup>123</sup>    | Antineoplastic | 851 | Bromochlorosalicylanilide <sup>1234</sup> | Antifungal |
| 342 | Midostaurin <sup>1234</sup>    | Antineoplastic | 852 | Butenafine <sup>1234</sup>                | Antifungal |
| 343 | Mitobronitol <sup>123</sup>    | Antineoplastic | 853 | Butoconazole <sup>1234</sup>              | Antifungal |
| 344 | Mitoguazone <sup>1234</sup>    | Antineoplastic | 854 | Caspofungin <sup>1234</sup>               | Antifungal |
| 345 | Mitomycin <sup>12</sup>        | Antineoplastic | 855 | Chlormidazole <sup>1234</sup>             | Antifungal |
| 346 | Mitotane <sup>1234</sup>       | Antineoplastic | 856 | Chlorophetanol <sup>1234</sup>            | Antifungal |
| 347 | Mitoxantrone <sup>12</sup>     | Antineoplastic | 857 | Chlorphenesin <sup>12</sup>               | Antifungal |
| 348 | Momelotinib <sup>123</sup>     | Antineoplastic | 858 | Ciclopirox <sup>1234</sup>                | Antifungal |
| 349 | Nelarabine <sup>1234</sup>     | Antineoplastic | 859 | Clotrimazole <sup>12</sup>                | Antifungal |
| 350 | Neratinib <sup>1234</sup>      | Antineoplastic | 860 | Croconazole <sup>123</sup>                | Antifungal |
| 351 | Nilotinib <sup>1234</sup>      | Antineoplastic | 861 | Dimazole <sup>1234</sup>                  | Antifungal |
| 352 | Nimustine <sup>1234</sup>      | Antineoplastic | 862 | Eberconazole <sup>1234</sup>              | Antifungal |
| 353 | Nintedanib <sup>1234</sup>     | Antineoplastic | 863 | Econazole <sup>1234</sup>                 | Antifungal |
| 354 | Niraparib <sup>1234</sup>      | Antineoplastic | 864 | Efinaconazole <sup>1234</sup>             | Antifungal |
| 355 | Olaparib <sup>1234</sup>       | Antineoplastic | 865 | Ethylparaben <sup>1234</sup>              | Antifungal |
| 356 | Olmotinib <sup>1234</sup>      | Antineoplastic | 866 | Fenticonazole <sup>1234</sup>             | Antifungal |
| 357 | Omacetaxine <sup>1234</sup>    | Antineoplastic | 867 | Fluconazole <sup>1234</sup>               | Antifungal |
| 358 | Oprozomib <sup>123</sup>       | Antineoplastic | 868 | Flucytosine <sup>1234</sup>               | Antifungal |
| 359 | Ortataxel <sup>123</sup>       | Antineoplastic | 869 | Flutrimazole <sup>1234</sup>              | Antifungal |
| 360 | Osimertinib <sup>1234</sup>    | Antineoplastic | 870 | Fosfluconazole <sup>1234</sup>            | Antifungal |
| 361 | Paclitaxel <sup>1234</sup>     | Antineoplastic | 871 | Griseofulvin <sup>12</sup>                | Antifungal |
| 362 | Pacritinib <sup>123</sup>      | Antineoplastic | 872 | Haloprogin <sup>1234</sup>                | Antifungal |
| 363 | Palbociclib <sup>1234</sup>    | Antineoplastic | 873 | Hexaconazole <sup>123</sup>               | Antifungal |
| 364 | Panobinostat <sup>1234</sup>   | Antineoplastic | 874 | Isavuconazole <sup>1234</sup>             | Antifungal |
| 365 | Pazopanib <sup>123</sup>       | Antineoplastic | 875 | Isoconazole <sup>1234</sup>               | Antifungal |
| 366 | Pemetrexed <sup>1234</sup>     | Antineoplastic | 876 | Itraconazole <sup>1234</sup>              | Antifungal |
| 367 | Pemigatinib <sup>1234</sup>    | Antineoplastic | 877 | Ketoconazole <sup>1234</sup>              | Antifungal |
| 368 | Pentostatin <sup>1234</sup>    | Antineoplastic | 878 | Luliconazole <sup>1234</sup>              | Antifungal |
| 369 | Pipobroman <sup>1234</sup>     | Antineoplastic | 879 | Mepartricin <sup>12</sup>                 | Antifungal |
| 370 | Pirarubicin <sup>12</sup>      | Antineoplastic | 880 | Micafungin <sup>1234</sup>                | Antifungal |
| 371 | Pixantrone <sup>12</sup>       | Antineoplastic | 881 | Miconazole <sup>1234</sup>                | Antifungal |
| 372 | Plicamycin <sup>12</sup>       | Antineoplastic | 882 | Naftifine <sup>1234</sup>                 | Antifungal |
| 373 | Plitidepsin <sup>1234</sup>    | Antineoplastic | 883 | Natamycin <sup>12</sup>                   | Antifungal |
| 374 | Ponatinib <sup>1234</sup>      | Antineoplastic | 884 | Neticonazole <sup>1234</sup>              | Antifungal |
| 375 | Pralatrexate <sup>1234</sup>   | Antineoplastic | 885 | Nystatin <sup>1234</sup>                  | Antifungal |
| 376 | Pralsetinib <sup>1234</sup>    | Antineoplastic | 886 | Omoconazole <sup>1234</sup>               | Antifungal |
| 377 | Prednimustine <sup>1234</sup>  | Antineoplastic | 887 | Oxiconazole <sup>1234</sup>               | Antifungal |
| 378 | Procarbazine <sup>1234</sup>   | Antineoplastic | 888 | Pecilocin <sup>12</sup>                   | Antifungal |
| 379 | Quizartinib <sup>1234</sup>    | Antineoplastic | 889 | Pentamidine <sup>1234</sup>               | Antifungal |
| 380 | Radotinib <sup>1234</sup>      | Antineoplastic | 890 | Posaconazole <sup>1234</sup>              | Antifungal |
| 381 | Raltitrexed <sup>1234</sup>    | Antineoplastic | 891 | Pyrrolnitrin <sup>123</sup>               | Antifungal |
| 382 | Ranimustine <sup>1234</sup>    | Antineoplastic | 892 | Ravuconazole <sup>1234</sup>              | Antifungal |
| 383 | Regorafenib <sup>1234</sup>    | Antineoplastic | 893 | Sertaconazole <sup>1234</sup>             | Antifungal |
| 384 | Ribociclib <sup>1234</sup>     | Antineoplastic | 894 | Sulbentine <sup>1234</sup>                | Antifungal |

|     |                                    |                |     |                                    |              |
|-----|------------------------------------|----------------|-----|------------------------------------|--------------|
| 385 | Ridaforolimus <sup>123</sup>       | Antineoplastic | 895 | Sulconazole <sup>1234</sup>        | Antifungal   |
| 386 | Ripretinib <sup>1234</sup>         | Antineoplastic | 896 | Taurolidine <sup>12</sup>          | Antifungal   |
| 387 | Rociletinib <sup>123</sup>         | Antineoplastic | 897 | Tavaborole <sup>1234</sup>         | Antifungal   |
| 388 | Romidepsin <sup>1234</sup>         | Antineoplastic | 898 | Terbinafine <sup>1234</sup>        | Antifungal   |
| 389 | Rubitecan <sup>12</sup>            | Antineoplastic | 899 | Terconazole <sup>1234</sup>        | Antifungal   |
| 390 | Rucaparib <sup>12</sup>            | Antineoplastic | 900 | Thiabendazole <sup>1234</sup>      | Antifungal   |
| 391 | Ruxolitinib <sup>1234</sup>        | Antineoplastic | 901 | Ticlatone <sup>1234</sup>          | Antifungal   |
| 392 | Selinexor <sup>1234</sup>          | Antineoplastic | 902 | Tioconazole <sup>1234</sup>        | Antifungal   |
| 393 | Selpercatinib <sup>1234</sup>      | Antineoplastic | 903 | Tolciclate <sup>1234</sup>         | Antifungal   |
| 394 | Selumetinib <sup>1234</sup>        | Antineoplastic | 904 | Tolnaftate <sup>1234</sup>         | Antifungal   |
| 395 | Semaxanib <sup>123</sup>           | Antineoplastic | 905 | Tribromometacresol <sup>1234</sup> | Antifungal   |
| 396 | Semustine <sup>1234</sup>          | Antineoplastic | 906 | Undecylenic acid <sup>1234</sup>   | Antifungal   |
| 397 | Silatecan <sup>123</sup>           | Antineoplastic | 907 | Voriconazole <sup>1234</sup>       | Antifungal   |
| 398 | Sonidegib <sup>1234</sup>          | Antineoplastic | 908 | Acarbose <sup>1234</sup>           | Antidiabetic |
| 399 | Sorafenib <sup>1234</sup>          | Antineoplastic | 909 | Acetohexamide <sup>1234</sup>      | Antidiabetic |
| 400 | Streptozocin <sup>12</sup>         | Antineoplastic | 910 | Aleglitazar <sup>1234</sup>        | Antidiabetic |
| 401 | Sunitinib <sup>1234</sup>          | Antineoplastic | 911 | Alogliptin <sup>1234</sup>         | Antidiabetic |
| 402 | Talazoparib <sup>1234</sup>        | Antineoplastic | 912 | Anagliptin <sup>1234</sup>         | Antidiabetic |
| 403 | Tegafur <sup>1234</sup>            | Antineoplastic | 913 | Benfluorex <sup>1234</sup>         | Antidiabetic |
| 404 | Temozolomide <sup>1234</sup>       | Antineoplastic | 914 | Bexagliflozin <sup>1234</sup>      | Antidiabetic |
| 405 | Temsirolimus <sup>1234</sup>       | Antineoplastic | 915 | Bromocriptine <sup>1234</sup>      | Antidiabetic |
| 406 | Teniposide <sup>1234</sup>         | Antineoplastic | 916 | Buformin <sup>1234</sup>           | Antidiabetic |
| 407 | Tepotinib <sup>1234</sup>          | Antineoplastic | 917 | Canagliflozin <sup>1234</sup>      | Antidiabetic |
| 408 | Tesetaxel <sup>123</sup>           | Antineoplastic | 918 | Carbutamide <sup>1234</sup>        | Antidiabetic |
| 409 | Testolactone <sup>1234</sup>       | Antineoplastic | 919 | Chlorpropamide <sup>1234</sup>     | Antidiabetic |
| 410 | Tezacitabine <sup>123</sup>        | Antineoplastic | 920 | Ciglitazone <sup>12</sup>          | Antidiabetic |
| 411 | Thiotepa <sup>1234</sup>           | Antineoplastic | 921 | Dapagliflozin <sup>1234</sup>      | Antidiabetic |
| 412 | Tiazofurine <sup>123</sup>         | Antineoplastic | 922 | Darglitazone <sup>12</sup>         | Antidiabetic |
| 413 | Tioguanine <sup>12</sup>           | Antineoplastic | 923 | Empagliflozin <sup>1234</sup>      | Antidiabetic |
| 414 | Tipifarnib <sup>1234</sup>         | Antineoplastic | 924 | Englitazone <sup>1234</sup>        | Antidiabetic |
| 415 | Tivozanib <sup>1234</sup>          | Antineoplastic | 925 | Epalrestat <sup>12</sup>           | Antidiabetic |
| 416 | Toceranib <sup>123</sup>           | Antineoplastic | 926 | Ertugliflozin <sup>1234</sup>      | Antidiabetic |
| 417 | Topotecan <sup>1234</sup>          | Antineoplastic | 927 | Evogliptin <sup>1234</sup>         | Antidiabetic |
| 418 | Trabectedin <sup>1234</sup>        | Antineoplastic | 928 | Fasiglifam <sup>1234</sup>         | Antidiabetic |
| 419 | Trametinib <sup>1234</sup>         | Antineoplastic | 929 | Fidarestat <sup>123</sup>          | Antidiabetic |
| 420 | Treosulfan <sup>1234</sup>         | Antineoplastic | 930 | Gemigliptin <sup>12</sup>          | Antidiabetic |
| 421 | Triapine <sup>1234</sup>           | Antineoplastic | 931 | Glibenclamide <sup>1234</sup>      | Antidiabetic |
| 422 | Triaziquone <sup>1234</sup>        | Antineoplastic | 932 | Glibornuride <sup>1234</sup>       | Antidiabetic |
| 423 | Triethylenemelamine <sup>123</sup> | Antineoplastic | 933 | Glicaramide <sup>1234</sup>        | Antidiabetic |
| 424 | Trofosfamide <sup>1234</sup>       | Antineoplastic | 934 | Gliclazide <sup>1234</sup>         | Antidiabetic |
| 425 | Tucatinib <sup>1234</sup>          | Antineoplastic | 935 | Glimepiride <sup>1234</sup>        | Antidiabetic |
| 426 | Uramustine <sup>1234</sup>         | Antineoplastic | 936 | Glipizide <sup>1234</sup>          | Antidiabetic |
| 427 | Valrubicin <sup>12</sup>           | Antineoplastic | 937 | Gliquidone <sup>1234</sup>         | Antidiabetic |
| 428 | Vandetanib <sup>1234</sup>         | Antineoplastic | 938 | Glisoxepide <sup>1234</sup>        | Antidiabetic |
| 429 | Vemurafenib <sup>1234</sup>        | Antineoplastic | 939 | Glycopyramide <sup>1234</sup>      | Antidiabetic |
| 430 | Venetoclax <sup>1234</sup>         | Antineoplastic | 940 | Glymidine <sup>1234</sup>          | Antidiabetic |
| 431 | Vinblastine <sup>1234</sup>        | Antineoplastic | 941 | Gosogliptin <sup>1234</sup>        | Antidiabetic |
| 432 | Vincristine <sup>1234</sup>        | Antineoplastic | 942 | Ipragliflozin <sup>1234</sup>      | Antidiabetic |
| 433 | Vindesine <sup>1234</sup>          | Antineoplastic | 943 | Linagliptin <sup>1234</sup>        | Antidiabetic |
| 434 | Vinflunine <sup>1234</sup>         | Antineoplastic | 944 | Lobeglitazone <sup>1234</sup>      | Antidiabetic |
| 435 | Vinorelbine <sup>1234</sup>        | Antineoplastic | 945 | Luseogliflozin <sup>1234</sup>     | Antidiabetic |
| 436 | Vismodegib <sup>1234</sup>         | Antineoplastic | 946 | Metahexamide <sup>1234</sup>       | Antidiabetic |
| 437 | Vorinostat <sup>1234</sup>         | Antineoplastic | 947 | Metformin <sup>1234</sup>          | Antidiabetic |
| 438 | Vosaroxin <sup>1234</sup>          | Antineoplastic | 948 | Miglitol <sup>1234</sup>           | Antidiabetic |
| 439 | Zorubicin <sup>12</sup>            | Antineoplastic | 949 | Mitiglinide <sup>1234</sup>        | Antidiabetic |
| 440 | 2,4-Diaminopyrimidine <sup>1</sup> | Antibacterial  | 950 | Muraglitazar <sup>1234</sup>       | Antidiabetic |
| 441 | Alatrofloxacin <sup>1234</sup>     | Antibacterial  | 951 | Nateglinide <sup>1234</sup>        | Antidiabetic |



|     |                                  |               |      |                                         |                 |
|-----|----------------------------------|---------------|------|-----------------------------------------|-----------------|
| 442 | Amdinocillin <sup>1234</sup>     | Antibacterial | 952  | Netoglitazone <sup>1234</sup>           | Antidiabetic    |
| 443 | Amikacin <sup>1234</sup>         | Antibacterial | 953  | Omarigliptin <sup>1234</sup>            | Antidiabetic    |
| 444 | Amoxicillin <sup>1234</sup>      | Antibacterial | 954  | Phenformin <sup>1234</sup>              | Antidiabetic    |
| 445 | Ampicillin <sup>1234</sup>       | Antibacterial | 955  | Pioglitazone <sup>1234</sup>            | Antidiabetic    |
| 446 | Apramycin <sup>123</sup>         | Antibacterial | 956  | Ranirestat <sup>1234</sup>              | Antidiabetic    |
| 447 | Arbekacin <sup>1234</sup>        | Antibacterial | 957  | Remogliflozin etabonate <sup>1234</sup> | Antidiabetic    |
| 448 | Aspoxicillin <sup>1234</sup>     | Antibacterial | 958  | Repaglinide <sup>1234</sup>             | Antidiabetic    |
| 449 | Astomicin <sup>1234</sup>        | Antibacterial | 959  | Rivoglitazone <sup>1234</sup>           | Antidiabetic    |
| 450 | Avibactam <sup>1234</sup>        | Antibacterial | 960  | Rosiglitazone <sup>1234</sup>           | Antidiabetic    |
| 451 | Azidamfenicol <sup>1</sup>       | Antibacterial | 961  | Saroglitazar <sup>1234</sup>            | Antidiabetic    |
| 452 | Azidocillin <sup>1234</sup>      | Antibacterial | 962  | Saxagliptin <sup>1234</sup>             | Antidiabetic    |
| 453 | Azithromycin <sup>1234</sup>     | Antibacterial | 963  | Sergliflozin etabonate <sup>1234</sup>  | Antidiabetic    |
| 454 | Azlocillin <sup>1234</sup>       | Antibacterial | 964  | Sitagliptin <sup>1234</sup>             | Antidiabetic    |
| 455 | Aztreonam <sup>1234</sup>        | Antibacterial | 965  | Sotagliflozin <sup>1234</sup>           | Antidiabetic    |
| 456 | Bacampicillin <sup>1234</sup>    | Antibacterial | 966  | Teneligliptin <sup>1234</sup>           | Antidiabetic    |
| 457 | Bacitracin <sup>1234</sup>       | Antibacterial | 967  | Tesaglitazar <sup>1234</sup>            | Antidiabetic    |
| 458 | Balofloxacin <sup>1234</sup>     | Antibacterial | 968  | Thiazolidinedione <sup>123</sup>        | Antidiabetic    |
| 459 | Bekanamycin <sup>1234</sup>      | Antibacterial | 969  | Tofogliflozin <sup>1234</sup>           | Antidiabetic    |
| 460 | Benzylpenicillin <sup>1234</sup> | Antibacterial | 970  | Tolazamide <sup>1234</sup>              | Antidiabetic    |
| 461 | Besifloxacin <sup>1234</sup>     | Antibacterial | 971  | Tolbutamide <sup>1234</sup>             | Antidiabetic    |
| 462 | Biapenem <sup>1234</sup>         | Antibacterial | 972  | Tolrestat <sup>1234</sup>               | Antidiabetic    |
| 463 | Boromycin <sup>12</sup>          | Antibacterial | 973  | Trelagliptin <sup>1234</sup>            | Antidiabetic    |
| 464 | Brodinoprim <sup>1234</sup>      | Antibacterial | 974  | Troglitazone <sup>1234</sup>            | Antidiabetic    |
| 465 | Carbenicillin <sup>1234</sup>    | Antibacterial | 975  | Vildagliptin <sup>1234</sup>            | Antidiabetic    |
| 466 | Carindacillin <sup>1234</sup>    | Antibacterial | 976  | Voglibose <sup>1234</sup>               | Antidiabetic    |
| 467 | Carumonam <sup>1234</sup>        | Antibacterial | 977  | Zenarestat <sup>123</sup>               | Antidiabetic    |
| 468 | Cefacetrile <sup>1234</sup>      | Antibacterial | 978  | Acebutolol <sup>1234</sup>              | Anti-arrhythmic |
| 469 | Cefaclor <sup>1234</sup>         | Antibacterial | 979  | Ajmaline <sup>1234</sup>                | Anti-arrhythmic |
| 470 | Cefadroxil <sup>1234</sup>       | Antibacterial | 980  | Amiodarone <sup>1234</sup>              | Anti-arrhythmic |
| 471 | Cefalexin                        | Antibacterial | 981  | Aprindine <sup>1234</sup>               | Anti-arrhythmic |
| 472 | Cefaloglycin <sup>1234</sup>     | Antibacterial | 982  | Atenolol <sup>1234</sup>                | Anti-arrhythmic |
| 473 | Cefalonium <sup>1234</sup>       | Antibacterial | 983  | Atropine <sup>123</sup>                 | Anti-arrhythmic |
| 474 | Cefaloridine <sup>1234</sup>     | Antibacterial | 984  | Bretylum <sup>1234</sup>                | Anti-arrhythmic |
| 475 | Cefalotin <sup>1234</sup>        | Antibacterial | 985  | Bunaftine <sup>1234</sup>               | Anti-arrhythmic |
| 476 | Cefamandole <sup>1234</sup>      | Antibacterial | 986  | Celivarone <sup>1234</sup>              | Anti-arrhythmic |
| 477 | Cefapirin <sup>1234</sup>        | Antibacterial | 987  | Cibenzoline <sup>1234</sup>             | Anti-arrhythmic |
| 478 | Cefatrizine <sup>1234</sup>      | Antibacterial | 988  | Digitoxin <sup>1234</sup>               | Anti-arrhythmic |
| 479 | Cefazaflur <sup>1234</sup>       | Antibacterial | 989  | Digoxin <sup>1234</sup>                 | Anti-arrhythmic |
| 480 | Cefazedone <sup>1234</sup>       | Antibacterial | 990  | Diltiazem <sup>1234</sup>               | Anti-arrhythmic |
| 481 | Cefazolin <sup>1234</sup>        | Antibacterial | 991  | Disopyramide <sup>12</sup>              | Anti-arrhythmic |
| 482 | Cefbuperazone <sup>1234</sup>    | Antibacterial | 992  | Dofetilide <sup>1234</sup>              | Anti-arrhythmic |
| 483 | Cefcapene <sup>1234</sup>        | Antibacterial | 993  | Dronedarone <sup>1234</sup>             | Anti-arrhythmic |
| 484 | Cefdaloxime <sup>1234</sup>      | Antibacterial | 994  | Encainide <sup>1234</sup>               | Anti-arrhythmic |
| 485 | Cefdinir <sup>1234</sup>         | Antibacterial | 995  | Esmolol <sup>1234</sup>                 | Anti-arrhythmic |
| 486 | Cefditoren <sup>1234</sup>       | Antibacterial | 996  | Ethacizine <sup>1234</sup>              | Anti-arrhythmic |
| 487 | Cefepime <sup>1234</sup>         | Antibacterial | 997  | Flecainide <sup>1234</sup>              | Anti-arrhythmic |
| 488 | Cefetamet <sup>1234</sup>        | Antibacterial | 998  | Hydroquinidine <sup>1234</sup>          | Anti-arrhythmic |
| 489 | Cefixime <sup>1234</sup>         | Antibacterial | 999  | Ibutilide <sup>1234</sup>               | Anti-arrhythmic |
| 490 | Cefmenoxime <sup>1234</sup>      | Antibacterial | 1000 | Indecainide <sup>12</sup>               | Anti-arrhythmic |
| 491 | Cefmetazole <sup>1234</sup>      | Antibacterial | 1001 | Lorajmine <sup>1234</sup>               | Anti-arrhythmic |
| 492 | Cefminox <sup>1234</sup>         | Antibacterial | 1002 | Lorcainide <sup>1234</sup>              | Anti-arrhythmic |
| 493 | Cefodizime <sup>1234</sup>       | Antibacterial | 1003 | Metoprolol <sup>1234</sup>              | Anti-arrhythmic |
| 494 | Cefonicid <sup>1234</sup>        | Antibacterial | 1004 | Moracizine <sup>1234</sup>              | Anti-arrhythmic |
| 495 | Cefoperazone <sup>1234</sup>     | Antibacterial | 1005 | Nadolol <sup>1234</sup>                 | Anti-arrhythmic |
| 496 | Ceforanide <sup>1234</sup>       | Antibacterial | 1006 | Nifekalant <sup>1234</sup>              | Anti-arrhythmic |
| 497 | Cefotaxime <sup>1234</sup>       | Antibacterial | 1007 | Ouabain <sup>1234</sup>                 | Anti-arrhythmic |
| 498 | Cefotetan <sup>1234</sup>        | Antibacterial | 1008 | Pindolol <sup>1234</sup>                | Anti-arrhythmic |

|     |                             |               |      |                              |                 |
|-----|-----------------------------|---------------|------|------------------------------|-----------------|
| 499 | Cefotiam <sup>1234</sup>    | Antibacterial | 1009 | Prajaline <sup>1234</sup>    | Anti-arrhythmic |
| 500 | Cefovecin <sup>123</sup>    | Antibacterial | 1010 | Procainamide <sup>1234</sup> | Anti-arrhythmic |
| 501 | Cefoxitin <sup>1234</sup>   | Antibacterial | 1011 | Propafenone <sup>1234</sup>  | Anti-arrhythmic |
| 502 | Cefozopran <sup>1234</sup>  | Antibacterial | 1012 | Propranolol <sup>12</sup>    | Anti-arrhythmic |
| 503 | Cefpimizole <sup>1234</sup> | Antibacterial | 1013 | Quinidine <sup>1234</sup>    | Anti-arrhythmic |
| 504 | Cefpiramide <sup>1234</sup> | Antibacterial | 1014 | Sotalol <sup>1234</sup>      | Anti-arrhythmic |
| 505 | Cefpirome <sup>1234</sup>   | Antibacterial | 1015 | Sparteine <sup>1234</sup>    | Anti-arrhythmic |
| 506 | Cefpodoxime <sup>1234</sup> | Antibacterial | 1016 | Tedisamil <sup>1234</sup>    | Anti-arrhythmic |
| 507 | Cefprozil <sup>1234</sup>   | Antibacterial | 1017 | Tocainide <sup>1234</sup>    | Anti-arrhythmic |
| 508 | Cefradine <sup>1234</sup>   | Antibacterial | 1018 | Verapamil <sup>1234</sup>    | Anti-arrhythmic |
| 509 | Cefroxadine <sup>1234</sup> | Antibacterial | 1019 | Vernakalant <sup>1234</sup>  | Anti-arrhythmic |
| 510 | Cefsulodin <sup>1234</sup>  | Antibacterial |      |                              |                 |

1. Molecule is in molecular set S<sub>1</sub>. 2. Molecule is in molecular set S<sub>2</sub>. 3. Molecule is in molecular set S<sub>3</sub>. 4. Molecule is in molecular set S<sub>4</sub>.

**Table S2.** Molecules in external validation set.

| No. | Name                  | Category                             |
|-----|-----------------------|--------------------------------------|
| 1   | Abiraterone acetate   | Antineoplastic                       |
| 2   | Acetylcysteine        | Analgesic, antineoplastic, antiviral |
| 3   | Anastrozole           | Antineoplastic                       |
| 4   | Apalutamide           | Antineoplastic                       |
| 5   | Avapritinib           | Antineoplastic                       |
| 6   | Berzosertib           | Antineoplastic                       |
| 7   | Capmatinib            | Antineoplastic                       |
| 8   | Celecoxib             | Analgesic, antineoplastic            |
| 9   | Cyproheptadine        | Analgesic                            |
| 10  | Cytarabine            | Antineoplastic, antiviral            |
| 11  | Darolutamide          | Antineoplastic                       |
| 12  | Dextromethorphan      | Analgesic, antiviral                 |
| 13  | Duvelisib             | Antineoplastic                       |
| 14  | Enzalutamide          | Antineoplastic                       |
| 15  | Exemestane            | Antineoplastic                       |
| 16  | Fulvestrant           | Antineoplastic                       |
| 17  | Glasdegib             | Antineoplastic                       |
| 18  | Lasmiditan            | Analgesic                            |
| 19  | Letrozole             | Antineoplastic                       |
| 20  | Lurbinectedin         | Antineoplastic                       |
| 21  | Methylethylgometriner | Analgesic                            |
| 22  | Mobocertinib          | Antineoplastic                       |
| 23  | Oliceridine           | Analgesic                            |
| 24  | Pomalidomide          | Analgesic, antineoplastic            |
| 25  | Promethazine          | Analgesic, antiviral                 |
| 26  | Rifampicin            | Antibacterial, antiviral             |
| 27  | Salicylic acid        | Analgesic, antibacterial, antifungal |
| 28  | Seliciclib            | Antineoplastic, antiviral            |
| 29  | Sotorasib             | Antineoplastic                       |
| 30  | Suxibuzone            | Analgesic, antineoplastic            |
| 31  | Talaporfin            | Antineoplastic                       |
| 32  | Tamoxifen             | Antineoplastic                       |
| 33  | Tazemetostat          | Antineoplastic                       |
| 34  | Tofacitinib           | Antineoplastic                       |
| 35  | Ubrogepant            | Analgesic                            |
| 36  | Vebicorvir            | Antiviral                            |
| 37  | Zanubrutinib          | Antineoplastic                       |
